# Supplementary material for: Non-destructive, high-content analysis of wheat grain traits using X-ray micro computed tomography
Source: PubMed Central journal article supplement (PMC5664813; doi:10.1186/s13007-017-0229-8), 2017-11-01

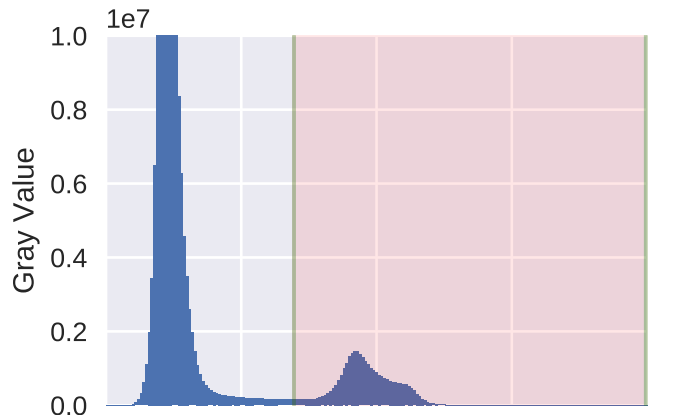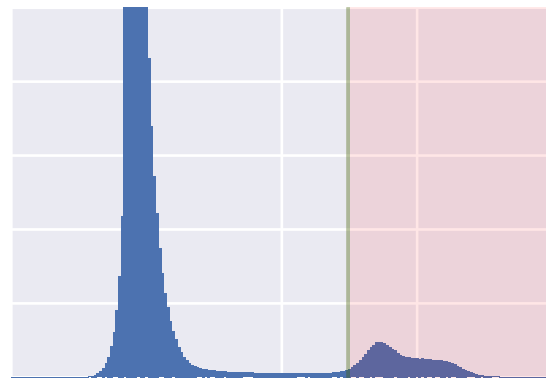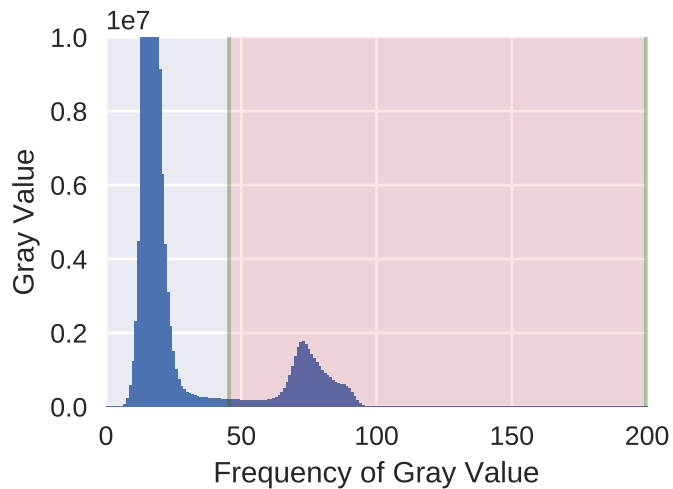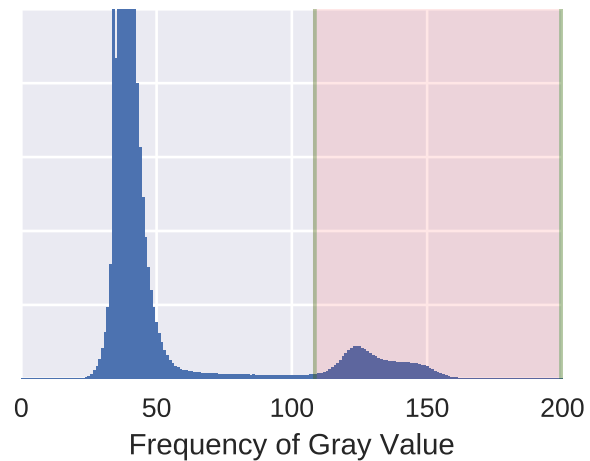

Supplement: 13007_2017_229_MOESM4_ESM.pdf [file 13007_2017_229_MOESM4_ESM.pdf]
